# Supplementary material
Source: MDPI journal article supplement (https://www.mdpi.com/2073-4352/9/7/356)
Supplement: s1 [file s1]

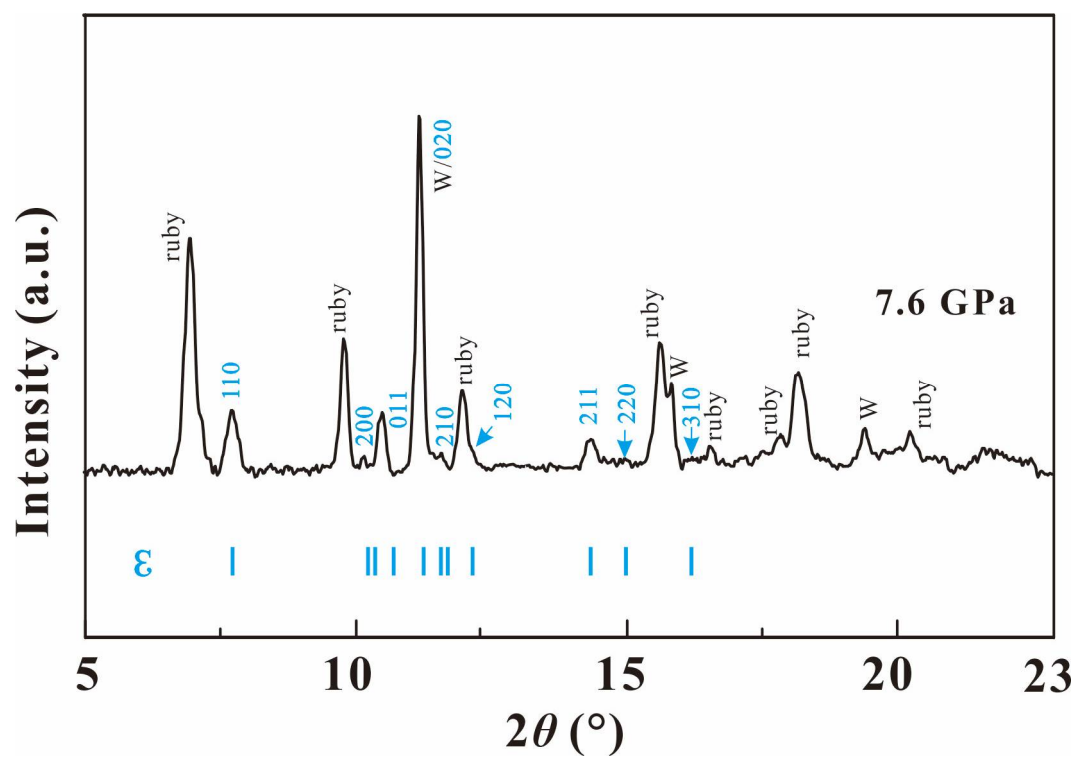

**Figure S1.** Selected x-ray diffraction patterns of compressed  $\epsilon$ -FeOOH under non-hydrostatic condition.
